# Supplementary material
Source: publisher figshare collection journal article supplement (https://gsapubs.figshare.com/ndownloader/files/22739504)
Supplement: Supplementary file 1 [file 22739504]

GSA Data Repository Item # 7512

Title of article Chino Valley Formation (Cambrian?) in northwestern Arizona

Author(s) Richard Hereford

see GSA Bulletin v. 86, p. 677 - 682

Contents 3 pages

Appendix A - Description of the Type Section

Appendix B - Description of Reference Section

---

---

---

---

---

---

---

---

## APPENDIX A. DESCRIPTION OF THE TYPE SECTION

Approximately 2 km northwest of Jerome in NE $\frac{1}{4}$ , NW $\frac{1}{4}$ ,  
sec. 21, T16N, R2E (unsurveyed) Clarkdale quad.  
(1944), Yavapai Co., Arizona

Martin Formation (Jerome Member, fetid dolomite unit;  
Teichert, 1965)

Dolomite finely crystalline, thinly laminated, fetid 5.2 m  
odor, light gray (5Y 6/1); forms ledge

## Chino Valley Formation (dolomite facies)

Dolomite, aphanitic, bedding 10-14 cm, parts easily 1.5  
along bedding, pale red purple (5RP 7/2); forms  
ledge, contact with Martin Formation appears wea-  
thered through as much as 50 cm.

Sandstone, coarse, dolomitic, massive, yellowish 0.6  
gray (5Y 7/2); forms slope

Sandstone, medium to coarse, dolomitic, massive, 0.3  
grayish yellow green (5GY 7/2), forms slope

Dolomite, aphanitic, scattered sand-size quartz 1.2  
<sup>grains</sup> elasties, friable, bedding indistinct, grayish  
yellow green (5GY 7/2) mottled with moderate red  
(5R 5/4); forms talus covered slope

Dolomite as above except moderate red (5R 5/4), 1.5  
contact with underlying Tapeats Sandstone is  
sharp

Total thickness of Chino Valley Formation 5.1 m

## Tapeats Sandstone

Sandstone, very coarse to granule conglomerate,  
subarkosic, silica cemented, cross-stratified,  
interbedded thin micaceous shales, grayish red  
(5R 4/2) and light brown (5YR 6/4), Corophioides-  
like burrows 50 cm below top, thickness variable,  
rests on Precambrian Deception Rhyolite (Anderson  
and Creasy 1958)

Total thickness of Tapeats Sandstone 6.7 m

## APPENDIX B. DESCRIPTION OF THE REFERENCE SECTIONS

### LITHIC SANDSTONE FACIES NEAR SIMMONS

Approximately 9 km southeast of Simmons in SE $\frac{1}{4}$  sec. 11,  
T17N, R3W, Simmons quad. (1947), Yavapai Co.,  
Arizona

Martin Formation (Jerome Member, fetid dolomite unit)

Dolomite, finely crystalline, fetid odor, thinly laminated, light olive gray (5Y 5/2); forms slope 6.1 m

Chino Valley Formation (lithic sandstone facies)

Sandstone, coarse, silica cemented, light gray (N8), forms slope, upper surface channeled with up 5 cm relief 0.9

Sandstone, very coarse, slightly dolomitic, numerous granules of dolomite rock fragments, cross-stratified, yellowish gray (5Y 7/2); forms resistant slope 2.1

Sandstone, medium to coarse, dolomitic, scattered granules and small pebbles of dolomite rock fragments, cross-stratified, very light gray (N8); forms slope 3.7

Sandstone, medium to coarse, dolomitic, numerous flat pebbles and granules of dolomite rock fragments, pale yellowish brown (10YR 6/2), sharp contact with underlying Tapeats Sandstone; forms ledge 0.9

Total thickness of Chino Valley Formation 7.6 m

Tapeats Sandstone

Sandstone, coarse to granule conglomerate, subarkosic silica cemented, cross-stratified, generally pinkish gray (5YR 8/1), grayish brown (5YR 3/2) and white (N9) also common, rests on Precambrian granite; forms resistant ledges 53.1

Total thickness of Tapeats Sandstone 53.1 m

APPENDIX B. CONT.

CONGLOMERATE FACIES ALONG GRANITE CREEK

Approximately 0.5 km south of Verde River in NE $\frac{1}{4}$   
sec. 14 and NW $\frac{1}{4}$  sec. 13, T17N, R2W, Paulden  
quad. (1947), Yavapai Co., Arizona

Martin Formation (Jerome Member, fetid dolomite unit)

Dolomite to dolomitic limestone, finely crystalline, 9.8 m  
thinly laminated, fetid odor lower 4 m, olive gray  
(5Y 4/1): forms ledge

Devonian Sandstone

Sandstone, very coarse to granule conglomerate, 2.1  
dolomitic, cross-stratified in part, numerous  
ripple marks, overlying fetid dolomite fills troughs  
on upper ripple marked surface, pale yellowish brown  
(10YR 6/2); forms prominent brown ledge, discontin-  
uous probably filling channels cut on underlying  
Chino Valley Formation

Chino Valley Formation (conglomerate facies)

Conglomerate, rounded pebbles and cobbles, boulders 3.0  
at base and top, interbedded coarse sandstone,  
clasts are moderate red (5R 4/6) to pale red (5R 6/2),  
upper surface is eroded with up to 70 cm relief,  
weathered boulders protrude into overlying dolomite,  
forms ledge

Dolomite, coarsely crystalline, up to 50% sand-size 0.4  
quartz elastics, cross-stratified, not laterally  
persistent, dark yellowish orange (10YR 6/6)

Conglomerate, rounded pebbles, boulders, and cobbles, 3.1  
many boulders near base are up to 60 cm in diameter,  
sandstone matrix, clasts same color as conglomerate  
above, sharp to gradational contact with underlying  
Tapeats Sandstone

Total thickness of Chino Valley Formation 6.5 m

Tapeats Sandstone

Sandstone very coarse, numerous lenses of granule 32.0  
conglomerate, subarkosic, silica cemented, cross-  
stratified, generally white (N9), grayish red (5R  
4/2) and moderate red (5R 4/6) also common, rests  
on Precambrian schist, forms resistant ledges

Total thickness of Tapeats Sandstone 32.0 m
